# Supplementary material for: 3D printing multifunctional fluorinated nanocomposites: tuning electroactivity, rheology and chemical reactivity
Source: Royal Society of Chemistry journal article supplement (doi:10.1039/c8ta00127h), 2018-01-01
Supplement: c8ta00127h1.pdf [file c8ta00127h1.pdf]

## Supporting Information: 3D printing fluorinated energetic nanocomposites: Effects of poly(methyl methacrylate) addition on processability and thermal performance of aluminum-poly(vinylidene fluoride) blends

Jose A. Bencomo<sup>a</sup>, Scott T. Iacono<sup>b</sup> and Jena McCollum<sup>\*a</sup>

<sup>a</sup> Department of Mechanical and Aerospace Engineering, University of Colorado Colorado Springs, Colorado Springs, USA

<sup>b</sup> Department of Chemistry and Chemistry Research Center, United States Air Force Academy, Colorado Springs, USA

\* Corresponding Author

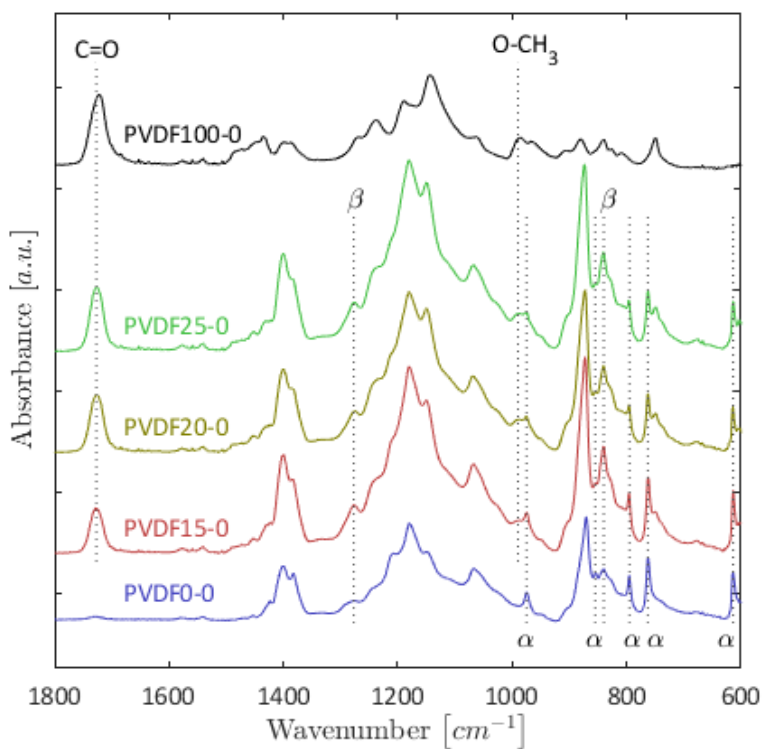

Figure S1 - FTIR spectra of pure PVDF, pure PMMA, and their blends.

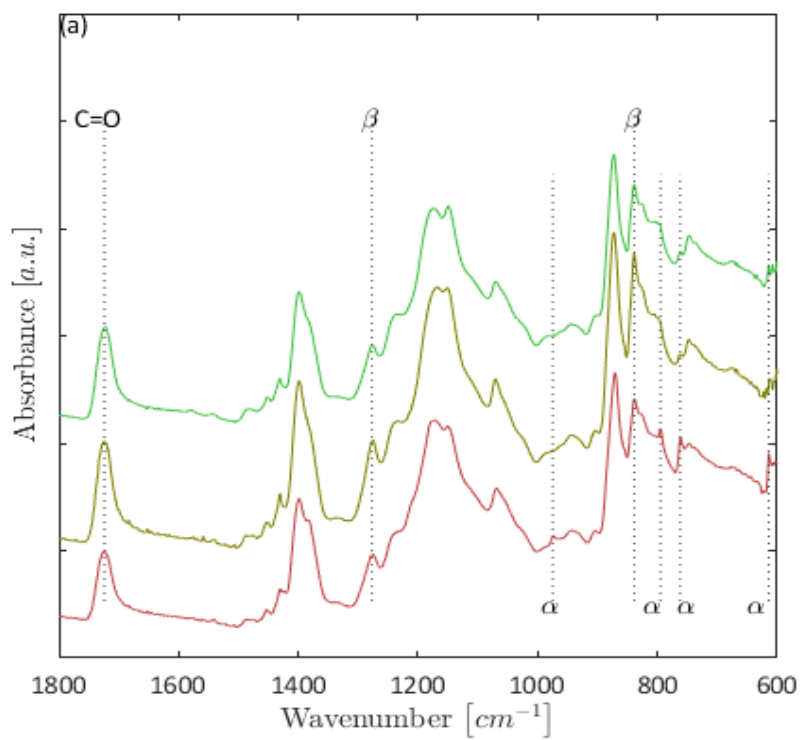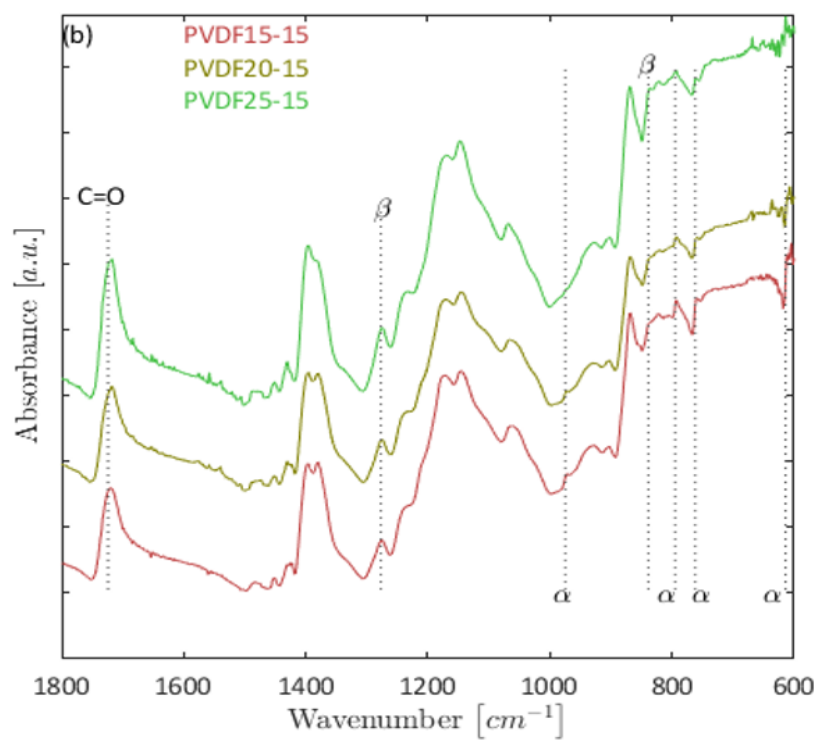

Figure S2 - FTIR spectra for PVDF/PMMA blends loaded with (a) 15 wt% and (b) 30 wt% Al.

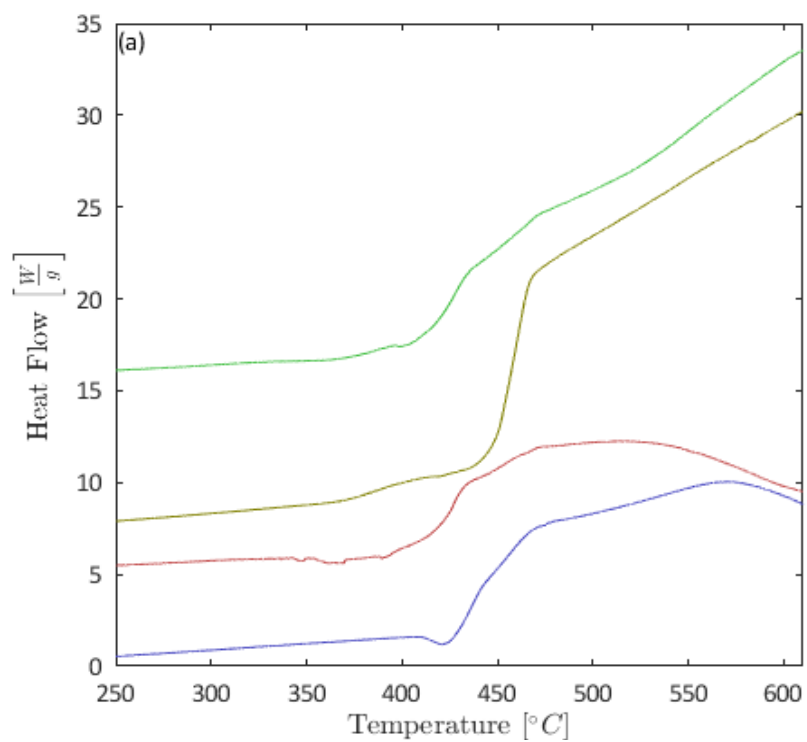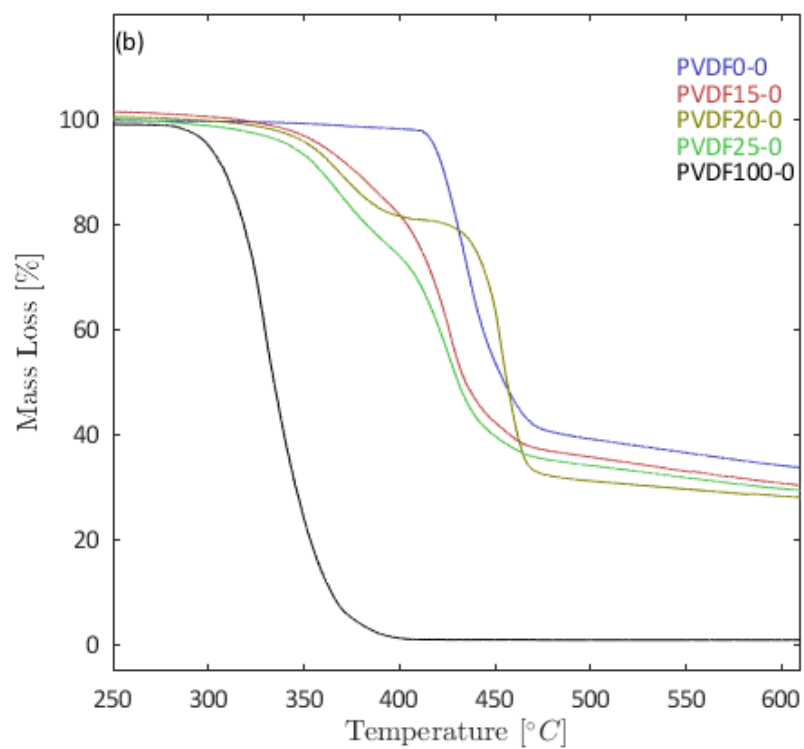

Figure S3 - Heat flow (a) and mass loss (b) curves for PVDF, PMMA, and their blends.

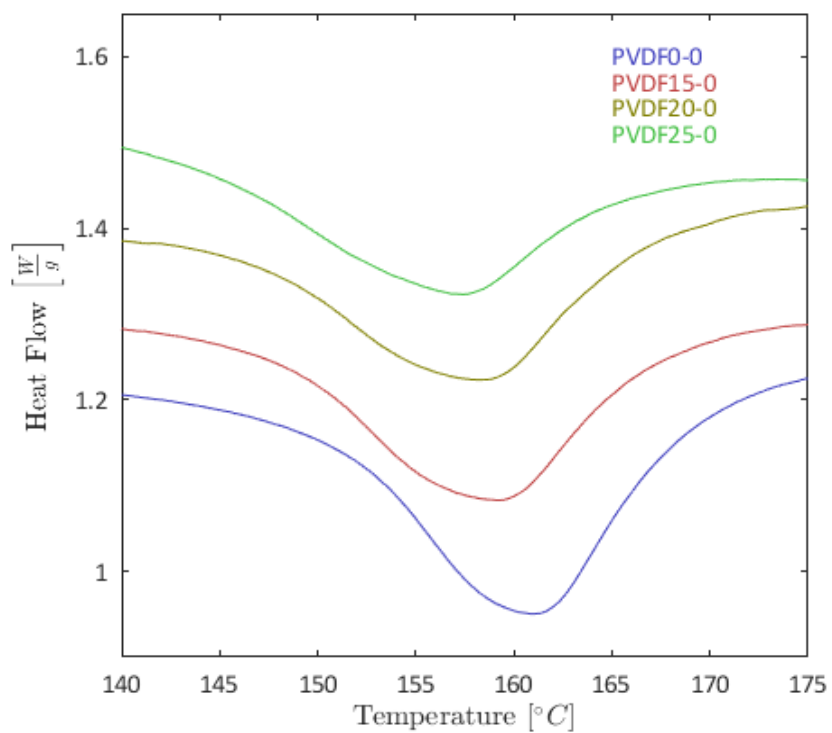

Figure S4 - Endothermic peaks indication PVDF melt.

---
